# Supplementary material for: Electrospun Cr-doped Bi4Ti3O12/Bi2Ti2O7 heterostructure fibers with enhanced visible-light photocatalytic properties
Source: Royal Society of Chemistry journal article supplement (doi:10.1039/c4ta06736c), 2015-01-01
Supplement: c4ta06736c1.pdf [file c4ta06736c1.pdf]

## Supplementary Materials

for

### Electrospun Cr-doped $\text{Bi}_4\text{Ti}_3\text{O}_{12}/\text{Bi}_2\text{Ti}_2\text{O}_7$ Heterostructures Fibers with Enhanced Visible-Light Photocatalytic Properties

Hongfei Shi,<sup>ab</sup> Huaqiao Tan,<sup>ab\*</sup> Wan-bin Zhu,<sup>c</sup> Zaicheng Sun,<sup>a\*</sup> Yuejia Ma<sup>a</sup> and  
Enbo Wang<sup>b\*</sup>

<sup>a</sup> State Key Laboratory of Luminescence and Applications, Changchun Institute of Optics, Fine Mechanics and Physics, Chinese Academy of Sciences, 3888 East Nanhu Road, Changchun 130033, People's Republic of China.

<sup>b</sup> Key Laboratory of Polyoxometalate Science of Ministry of Education, Department of Chemistry, Northeast Normal University, Ren Min Street No. 5268, Changchun, Jilin, 130024, People's Republic of China.

<sup>c</sup> State Key Laboratory of Applied Optics, Changchun Institute of Optics, Fine Mechanics and Physics, Chinese Academy of Sciences, Changchun 130033, China

\*[sunzc@ciomp.ac.cn](mailto:sunzc@ciomp.ac.cn)(ZS)

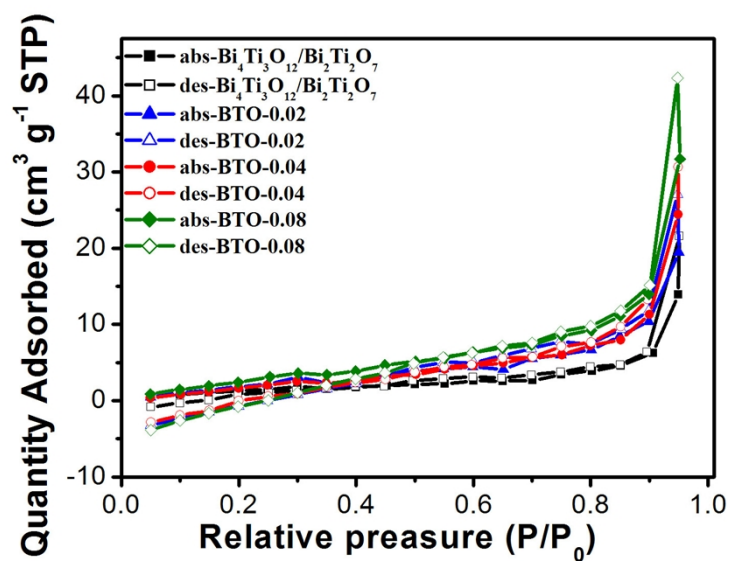

**Fig. S1.** The nitrogen adsorption-desorption isotherms curves of  $\text{Bi}_4\text{Ti}_3\text{O}_{12}/\text{Bi}_2\text{Ti}_2\text{O}_7$ , BTO-0.02, BTO-0.04 and BTO-0.08 (abs = adsorption, des = desorption).

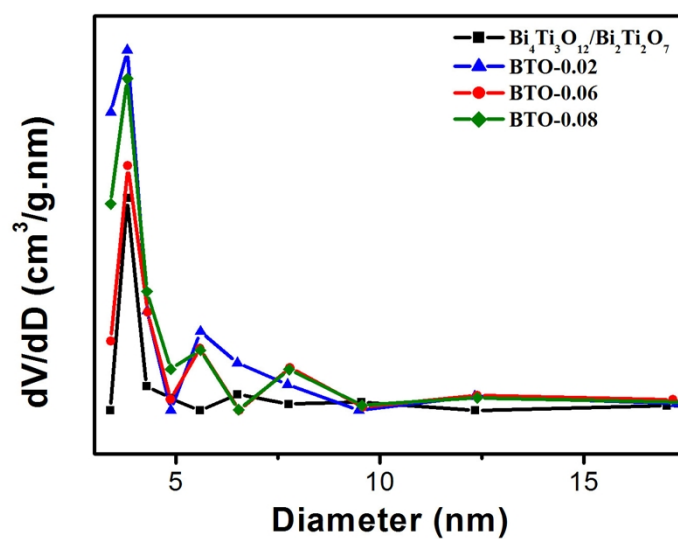

**Fig. S2** The pore size distribution curves of  $\text{Bi}_4\text{Ti}_3\text{O}_{12}/\text{Bi}_2\text{Ti}_2\text{O}_7$ , BTO-0.02, BTO-0.04 and BTO-0.08.

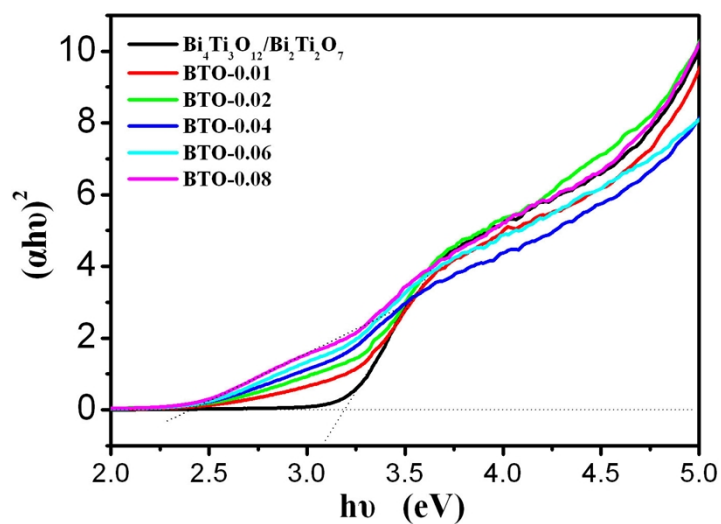

**Fig. S3** The band-gap evaluation from the plots of  $(\alpha h\nu)^2$  vs.  $h\nu$  of BTO samples.

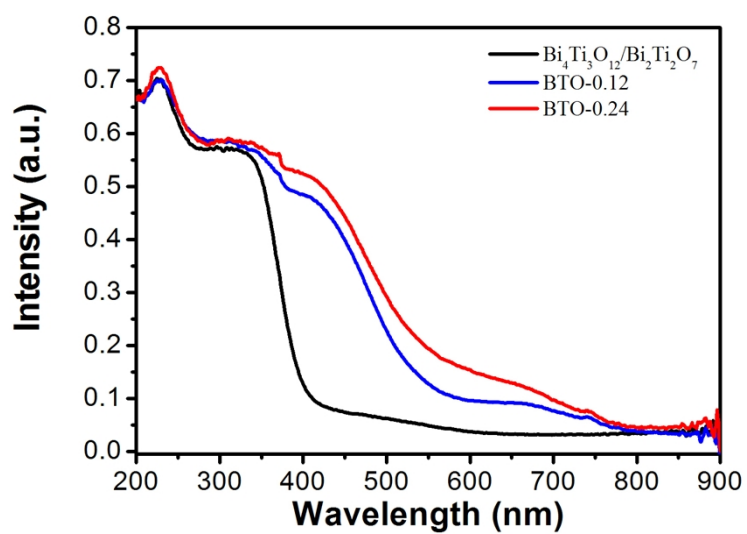

**Fig. S4.** UV-vis diffuse reflectance spectra of the  $\text{Bi}_4\text{Ti}_3\text{O}_{12}/\text{Bi}_2\text{Ti}_2\text{O}_7$  fibers, BTO-0.12 and BTO-0.24.

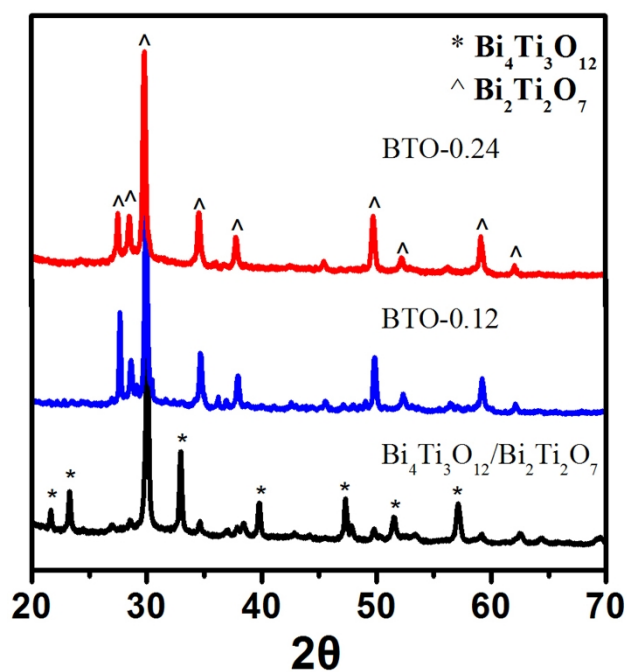

**Fig. S5.** The XRD of the  $\text{Bi}_4\text{Ti}_3\text{O}_{12}/\text{Bi}_2\text{Ti}_2\text{O}_7$  fibers, BTO-0.12 and BTO-0.24.

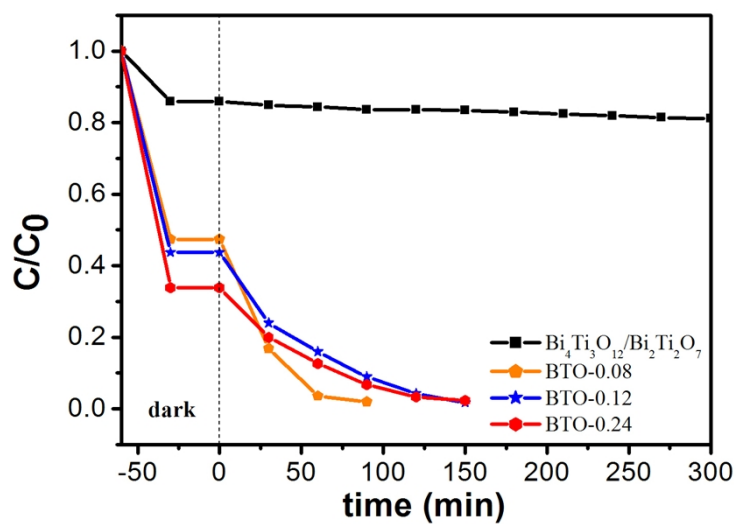

**Fig. S6.** Degradation profiles of MO, where  $C$  is the concentration of the MO,  $C_0$  is the initial concentration of MO.

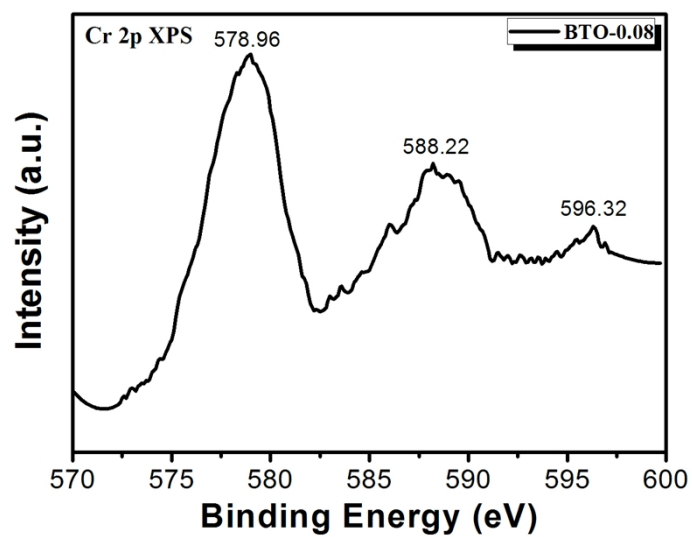

Fig. S7. The Cr 2p XPS spectra of BTO-0.08.

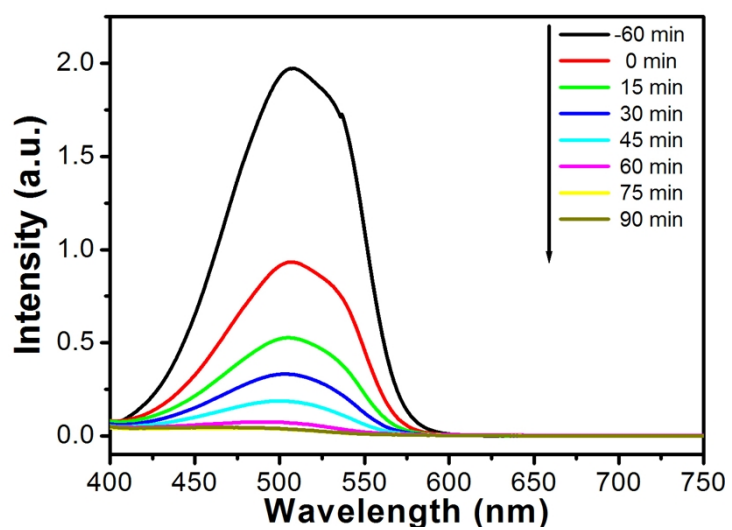

Fig. S8 Degradation of MO using BTO-0.08 as catalyst under visible light irradiation.

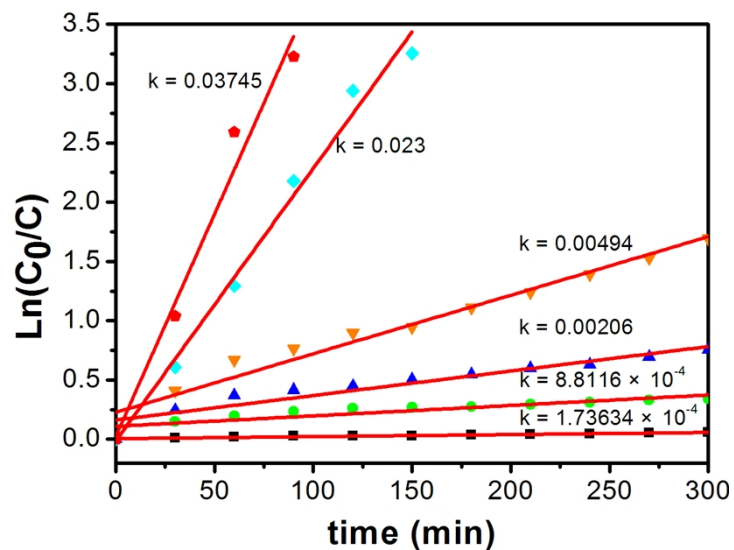

**Fig. S9** Kinetic linear simulation curves of MO photocatalytic degradation with the  $\text{Bi}_4\text{Ti}_3\text{O}_{12}/\text{Bi}_2\text{Ti}_2\text{O}_7$  and BTO fibers.

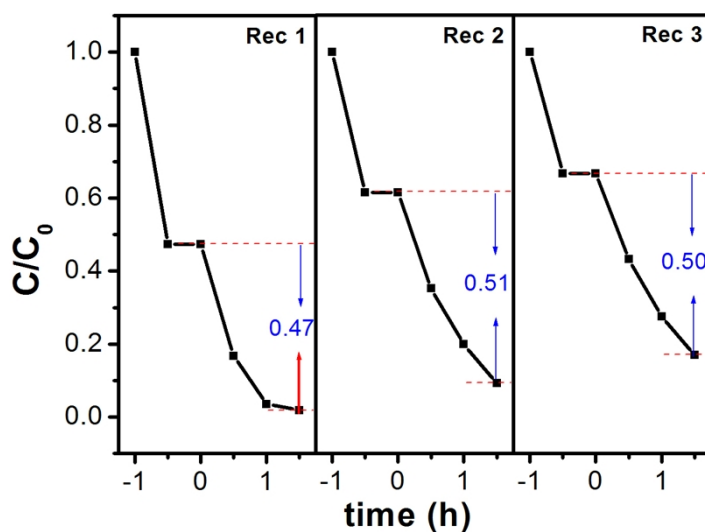

**Fig. S10** Cycling runs of photocatalytic degradation of MO in aqueous BTO-0.08 dispersions under visible light irradiation, where  $C$  is the concentration of the MO,  $C_0$  is the initial concentration of MO.

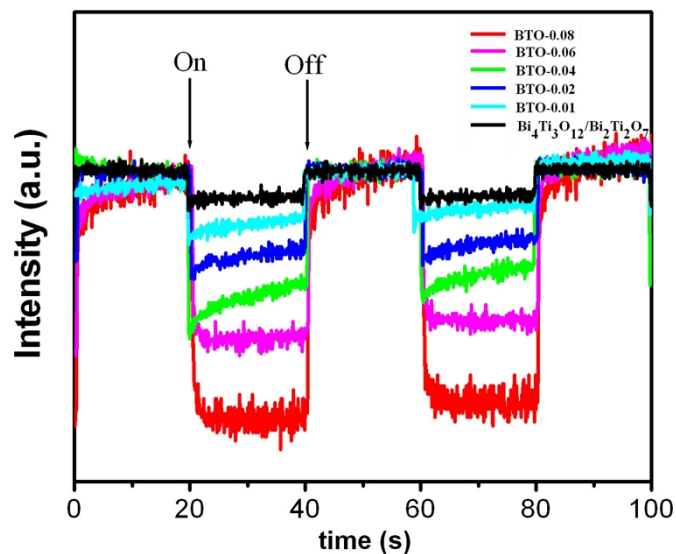

**Fig. S11** Transient photocurrent response of  $\text{Bi}_4\text{Ti}_3\text{O}_{12}/\text{Bi}_2\text{Ti}_2\text{O}_7$  and BTO samples in 0.5 M  $\text{Na}_2\text{SO}_4$  aqueous solutions under visible-light irradiation at 0 V vs.  $\text{Hg}/\text{Hg}_2\text{Cl}_2$

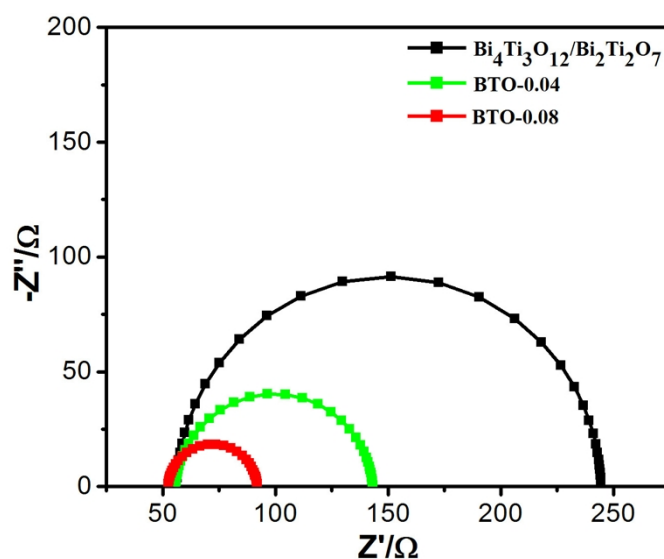

**Fig. S12.** The electrochemical impedance spectroscopy (EIS) of  $\text{Bi}_4\text{Ti}_3\text{O}_{12}/\text{Bi}_2\text{Ti}_2\text{O}_7$ , BTO-0.04 and BTO-0.08. Electrochemical impedance spectroscopy (EIS) was performed using a Model CS350 electrochemistry station (CH Instruments, Wuhan CorrTest Instrument Corporation, PRC) in 0.1 M  $\text{LiClO}_4$  ethanol solution at +0.25 V from 0.1 Hz to 100 KHz . The EIS data were fitted using ZSimpWin data analysis software.
